# Supplementary material for: Downregulation of SNRPG induces cell cycle arrest and sensitizes human glioblastoma cells to temozolomide by targeting Myc through a p53-dependent signaling pathway
Source: PubMed Central journal article supplement (PMC7142844; doi:10.20892/j.issn.2095-3941.2019.0164), 2020-02-15
Supplement: cbm-17-112-s001.pdf [file cbm-17-112-s001.pdf]

## Supplementary materials

**Table S1** General feature of patients

| Sample No. | Age | Gender | Family history of cancer (Y/N) | History of smoking (Y/N) | History of drinking (Y/N) | Diagnosis        | Tumor size $\geq$ 4.5cm (Y/N) | Tumor location (supratentorial/subtentorial) |
|------------|-----|--------|--------------------------------|--------------------------|---------------------------|------------------|-------------------------------|----------------------------------------------|
| G-0004     | 33  | Female | No                             | No                       | No                        | GBM (WHO IV)     | No                            | Supratentorial                               |
| G-0115     | 60  | Male   | No                             | No                       | No                        | GBM (WHO IV)     | No                            | Supratentorial                               |
| G-0132     | 48  | Male   | No                             | Yes                      | Yes                       | GBM (WHO III-IV) | Yes                           | Supratentorial                               |
| G-0266     | 41  | Female | No                             | No                       | No                        | GBM (WHO IV)     | Yes                           | Supratentorial                               |
| G-0285     | 62  | Female | No                             | No                       | No                        | GBM (WHO IV)     | No                            | Supratentorial                               |
| G-0396     | 55  | Female | No                             | No                       | No                        | GBM (WHO IV)     | Yes                           | Supratentorial                               |
| G-0558     | 55  | Female | No                             | No                       | No                        | GBM (WHO IV)     | Yes                           | Supratentorial                               |
| G-0666     | 65  | Male   | No                             | No                       | No                        | GBM (WHO IV)     | Yes                           | Supratentorial                               |
| G-0729     | 36  | Male   | No                             | Yes                      | No                        | GBM (WHO IV)     | Yes                           | Supratentorial                               |
| G-0821     | 54  | Male   | No                             | No                       | No                        | GBM (WHO IV)     | Yes                           | Supratentorial                               |
| G-0839     | 61  | Male   | No                             | No                       | No                        | GBM (WHO IV)     | Yes                           | Supratentorial                               |
| G-0940     | 57  | Female | No                             | No                       | No                        | GBM (WHO IV)     | No                            | Supratentorial                               |
| G-0944     | 60  | Female | No                             | No                       | No                        | GBM (WHO IV)     | Yes                           | Supratentorial                               |
| G-0996     | 67  | Male   | No                             | No                       | No                        | GBM (WHO IV)     | Yes                           | Supratentorial                               |

**Table S2** Downstream targets of Myc and p53 assessed via bioinformatics analysis

Continued

| Downstream targets of Myc assessed <i>via</i> bioinformatic analysis after knocking down SNRPG |            |             |             |
|------------------------------------------------------------------------------------------------|------------|-------------|-------------|
| Target molecules in dataset                                                                    | Regulation | Fold_change | <i>P</i>    |
| YAP1                                                                                           | Down       | -2.2004654  | 0.000899037 |
| WLS                                                                                            | Up         | 2.726611    | 6.40171E-07 |
| WISP1                                                                                          | Up         | 3.8561678   | 6.47337E-06 |
| VEGFA                                                                                          | Down       | -2.4606857  | 5.41824E-07 |
| VCAM1                                                                                          | Up         | 31.123684   | 2.31657E-06 |
| VARS                                                                                           | Down       | -2.152252   | 0.00037761  |
| UBE2S                                                                                          | Down       | -2.0267875  | 1.7197E-05  |
| UBE2C                                                                                          | Down       | -3.1527188  | 1.35925E-06 |
| TYMS                                                                                           | Down       | -2.8719566  | 2.08657E-06 |
| TXNIP                                                                                          | Up         | 2.5055113   | 2.4035E-06  |
| TP53I3                                                                                         | Up         | 3.2173285   | 3.44497E-05 |
| TMEM97                                                                                         | Down       | -2.6563091  | 0.00019609  |
| STMN1                                                                                          | Down       | -2.428075   | 3.16331E-05 |
| SPARC                                                                                          | Up         | 2.983737    | 5.69005E-06 |
| SOD2                                                                                           | Up         | 2.3653908   | 5.75501E-08 |
| SMAD1                                                                                          | Up         | 2.5486372   | 8.24186E-06 |
| SLC38A1                                                                                        | Down       | -2.1260705  | 0.000338194 |
| SGK1                                                                                           | Up         | 2.060982    | 1.9894E-05  |
| SERPINH1                                                                                       | Up         | 2.0949132   | 3.29312E-06 |
| SERPINE1                                                                                       | Down       | -2.776294   | 1.63496E-06 |
| SERPINA1                                                                                       | Up         | 3.655164    | 3.9032E-07  |
| SAT1                                                                                           | Up         | 2.3773856   | 1.38163E-06 |
| RRM2                                                                                           | Down       | -2.6255248  | 7.52328E-07 |
| RCC1                                                                                           | Down       | -2.737947   | 1.65928E-07 |
| RBP1                                                                                           | Up         | 2.9123752   | 6.93317E-05 |
| RARRES1                                                                                        | Up         | 4.272019    | 0.000169545 |
| RAD51                                                                                          | Down       | -2.2705245  | 9.49069E-05 |
| RAB40B                                                                                         | Up         | 3.1059167   | 2.69713E-06 |

| Downstream targets of Myc assessed <i>via</i> bioinformatic analysis after knocking down SNRPG |            |             |             |
|------------------------------------------------------------------------------------------------|------------|-------------|-------------|
| Target molecules in dataset                                                                    | Regulation | Fold_change | <i>P</i>    |
| PSAT1                                                                                          | Down       | -2.7941062  | 4.30426E-05 |
| PRDM1                                                                                          | Up         | 2.4411225   | 3.35728E-05 |
| PLK1                                                                                           | Down       | -2.3198814  | 0.000164844 |
| PFAS                                                                                           | Down       | -2.2056475  | 1.46729E-06 |
| PDGFRA                                                                                         | Up         | 3.8465552   | 0.000319564 |
| PCDH18                                                                                         | Up         | 4.690889    | 4.71284E-05 |
| NRP1                                                                                           | Up         | 2.192101    | 3.39564E-05 |
| NDRG1                                                                                          | Down       | -2.0377207  | 5.49884E-05 |
| MYC                                                                                            | Down       | -2.3531933  | 6.84799E-06 |
| MTFR2                                                                                          | Down       | -3.1721334  | 7.32363E-06 |
| MRE11A                                                                                         | Down       | -2.422145   | 9.68115E-06 |
| MKI67                                                                                          | Down       | -3.6224332  | 2.8842E-06  |
| MIR17HG                                                                                        | Down       | -2.792616   | 0.000221759 |
| MGP                                                                                            | Up         | 22.994284   | 3.3942E-07  |
| MFAP1                                                                                          | Down       | -2.154815   | 1.66954E-05 |
| MCM7                                                                                           | Down       | -3.4240937  | 1.39583E-06 |
| MCM6                                                                                           | Down       | -2.7770162  | 1.12485E-06 |
| MCM5                                                                                           | Down       | -2.7076702  | 0.000152585 |
| MAN2A1                                                                                         | Up         | 2.584694    | 5.13991E-06 |
| MAD2L1                                                                                         | Down       | -3.0069954  | 3.91006E-05 |
| LXN                                                                                            | Up         | 2.1453402   | 2.22587E-06 |
| LGMN                                                                                           | Up         | 2.3995295   | 1.73229E-05 |
| KRT7                                                                                           | Up         | 2.1850588   | 0.000203507 |
| ITM2B                                                                                          | Up         | 2.4764104   | 1.41161E-08 |
| ID3                                                                                            | Up         | 4.5758276   | 2.72157E-06 |
| ICAM1                                                                                          | Up         | 2.7644155   | 1.96913E-05 |
| HMGA1                                                                                          | Down       | -4.1570177  | 6.52401E-07 |
| HES1                                                                                           | Up         | 4.7940874   | 8.81984E-05 |

Continued

Table S2 Continued

Continued

| Downstream targets of Myc assessed <i>via</i> bioinformatic analysis after knocking down SNRPG |             |                   |                    |
|------------------------------------------------------------------------------------------------|-------------|-------------------|--------------------|
| Target molecules in dataset                                                                    | Regulation  | Fold_change       | P                  |
| HAS2                                                                                           | Down        | -2.077807         | 0.000111374        |
| GLG1                                                                                           | Up          | 2.0773172         | 4.01057E-06        |
| GFPT1                                                                                          | Down        | -4.121707         | 3.02735E-05        |
| GCSH                                                                                           | Down        | -2.9161048        | 1.13144E-05        |
| GCLM                                                                                           | Down        | -2.076191         | 6.14521E-07        |
| GBP2                                                                                           | Up          | 2.9921346         | 0.000191824        |
| GART                                                                                           | Down        | -2.694237         | 0.000257483        |
| FOXM1                                                                                          | Down        | -3.0084047        | 2.38538E-05        |
| <b>FOSL1</b>                                                                                   | <b>Down</b> | <b>-3.0467093</b> | <b>2.21821E-05</b> |
| <b>FOS</b>                                                                                     | <b>Up</b>   | <b>2.3506725</b>  | <b>1.93163E-05</b> |
| <b>FN1</b>                                                                                     | <b>Up</b>   | <b>3.2369347</b>  | <b>1.12496E-05</b> |
| FGF5                                                                                           | Down        | -2.0261834        | 0.000121213        |
| FCGRT                                                                                          | Up          | 2.0499787         | 2.14653E-05        |
| <b>FAS</b>                                                                                     | <b>Up</b>   | <b>2.1131759</b>  | <b>2.28379E-05</b> |
| EZH2                                                                                           | Down        | -2.6572704        | 3.36057E-05        |
| EXOSC8                                                                                         | Down        | -2.339027         | 6.42808E-07        |
| EMP1                                                                                           | Down        | -2.6436226        | 5.68407E-05        |
| <b>EIF4EBP1</b>                                                                                | <b>Down</b> | <b>-2.1822093</b> | <b>4.25906E-05</b> |
| EIF3G                                                                                          | Up          | 2.0444875         | 0.000525781        |
| <b>EIF2S1</b>                                                                                  | <b>Down</b> | <b>-2.4059823</b> | <b>2.03661E-06</b> |
| <b>EGR1</b>                                                                                    | <b>Up</b>   | <b>2.6178222</b>  | <b>7.71939E-06</b> |
| EFEMP1                                                                                         | Up          | 3.8927963         | 3.04738E-05        |
| EBI3                                                                                           | Up          | 5.3947735         | 0.00029493         |
| E2F1                                                                                           | Down        | -2.6413052        | 0.000395762        |
| <b>DUSP6</b>                                                                                   | <b>Down</b> | <b>-2.6694174</b> | <b>1.71495E-05</b> |
| DKK1                                                                                           | Down        | -2.4766245        | 0.000258911        |
| DHFR                                                                                           | Down        | -2.5963402        | 2.21914E-05        |
| CXCL10                                                                                         | Up          | 6.316949          | 8.62745E-06        |

| Downstream targets of Myc assessed <i>via</i> bioinformatic analysis after knocking down SNRPG |             |                   |                    |
|------------------------------------------------------------------------------------------------|-------------|-------------------|--------------------|
| Target molecules in dataset                                                                    | Regulation  | Fold_change       | P                  |
| CTBS                                                                                           | Down        | -2.0393775        | 0.000428111        |
| CSRP2                                                                                          | Down        | -2.0059276        | 2.51977E-06        |
| CRYAB                                                                                          | Up          | 7.0759397         | 3.75693E-05        |
| CPD                                                                                            | Up          | 2.2487748         | 1.51939E-06        |
| COL5A2                                                                                         | Up          | 5.0252233         | 1.22958E-06        |
| COL5A1                                                                                         | Up          | 2.1802685         | 7.51787E-06        |
| COL3A1                                                                                         | Up          | 6.0942416         | 2.7127E-05         |
| COL1A2                                                                                         | Up          | 3.3868077         | 2.98091E-07        |
| COL14A1                                                                                        | Up          | 3.668856          | 0.00015045         |
| CLEC3B                                                                                         | Up          | 3.7030663         | 1.25343E-06        |
| CKS2                                                                                           | Down        | -2.22107          | 2.06846E-07        |
| <b>CHEK1</b>                                                                                   | <b>Down</b> | <b>-2.2617967</b> | <b>6.8628E-05</b>  |
| <b>CEBPD</b>                                                                                   | <b>Up</b>   | <b>8.443227</b>   | <b>6.37108E-06</b> |
| <b>CDKN1A</b>                                                                                  | <b>Up</b>   | <b>2.0020273</b>  | <b>3.1422E-05</b>  |
| <b>CDK6</b>                                                                                    | <b>Up</b>   | <b>2.2414362</b>  | <b>2.83847E-05</b> |
| <b>CDK2</b>                                                                                    | <b>Down</b> | <b>-2.3414066</b> | <b>0.000723858</b> |
| <b>CDK1</b>                                                                                    | <b>Down</b> | <b>-3.3894331</b> | <b>3.41338E-08</b> |
| CDCA7                                                                                          | Down        | -2.5425134        | 3.25259E-05        |
| <b>CDC25C</b>                                                                                  | <b>Down</b> | <b>-2.9542015</b> | <b>1.06227E-05</b> |
| CDC25A                                                                                         | Down        | -2.0147529        | 0.002159371        |
| CDC20                                                                                          | Down        | -3.6122062        | 1.22727E-07        |
| CD274                                                                                          | Down        | -2.3226845        | 0.002961726        |
| CCNB2                                                                                          | Down        | -2.8234894        | 1.19585E-06        |
| <b>CCNB1</b>                                                                                   | <b>Down</b> | <b>-3.2859113</b> | <b>2.33511E-07</b> |
| <b>CCNA2</b>                                                                                   | <b>Down</b> | <b>-3.3991127</b> | <b>1.46568E-06</b> |
| C9orf3                                                                                         | Up          | 2.142429          | 0.000119559        |
| BUB1B                                                                                          | Down        | -3.9987106        | 4.8566E-06         |
| BUB1                                                                                           | Down        | -3.664866         | 1.47275E-06        |

Continued

Table S2 Continued

Continued

| Downstream targets of Myc assessed <i>via</i> bioinformatic analysis after knocking down SNRPG |            |             |             |
|------------------------------------------------------------------------------------------------|------------|-------------|-------------|
| Target molecules in dataset                                                                    | Regulation | Fold_change | P           |
| BRCA1                                                                                          | Down       | -3.013453   | 2.99571E-05 |
| BIRC5                                                                                          | Down       | -4.0315733  | 1.76944E-06 |
| BDNF                                                                                           | Up         | 2.0975358   | 3.10914E-06 |
| BCL6                                                                                           | Up         | 2.1456041   | 0.000507154 |
| BCAT1                                                                                          | Down       | -2.603652   | 1.53501E-06 |
| BBC3                                                                                           | Up         | 2.1616032   | 0.000223194 |
| AURKB                                                                                          | Down       | -2.6026242  | 7.70047E-06 |
| ASNS                                                                                           | Down       | -2.0371935  | 4.61309E-06 |
| ARL6IP1                                                                                        | Down       | -2.4931567  | 2.49777E-07 |
| ARHGAP22                                                                                       | Down       | -2.2010329  | 1.57562E-06 |
| ANGPT1                                                                                         | Up         | 3.9937463   | 0.000218086 |
| AKAP12                                                                                         | Down       | -2.8823323  | 1.32047E-06 |
| ADAMTS1                                                                                        | Down       | -2.3186843  | 3.74103E-07 |
| ABCE1                                                                                          | Down       | -2.2096348  | 4.0258E-05  |

| Downstream targets of p53 assessed <i>via</i> bioinformatic analysis after knocking down SNRPG |            |             |             |
|------------------------------------------------------------------------------------------------|------------|-------------|-------------|
| Target molecules in dataset                                                                    | Regulation | Fold_change | P           |
| ACP2                                                                                           | Up         | 2.5898085   | 3.46048E-06 |
| ACSL3                                                                                          | Down       | -2.747913   | 6.88464E-06 |
| ACTA2                                                                                          | Up         | 2.0995708   | 6.24381E-06 |
| ADCK3                                                                                          | Up         | 2.347324    | 0.003031234 |
| AKAP12                                                                                         | Down       | -2.8823323  | 1.32047E-06 |
| ALDH4A1                                                                                        | Up         | 2.4930303   | 0.000318248 |
| ANGPT1                                                                                         | Up         | 3.9937463   | 0.000218086 |
| ANLN                                                                                           | Down       | -4.2728977  | 1.81942E-05 |
| ARL6IP1                                                                                        | Down       | -2.4931567  | 2.49777E-07 |
| ASF1B                                                                                          | Down       | -2.924686   | 3.86935E-06 |

| Downstream targets of p53 assessed <i>via</i> bioinformatic analysis after knocking down SNRPG |            |             |             |
|------------------------------------------------------------------------------------------------|------------|-------------|-------------|
| Target molecules in dataset                                                                    | Regulation | Fold_change | P           |
| ASNS                                                                                           | Down       | -2.0371935  | 4.61309E-06 |
| ASPM                                                                                           | Down       | -4.345241   | 2.71048E-06 |
| ATAD2                                                                                          | Down       | -3.2450206  | 2.73272E-05 |
| AURKA                                                                                          | Down       | -3.0987566  | 6.72217E-07 |
| AURKB                                                                                          | Down       | -2.6026242  | 7.70047E-06 |
| AXIN2                                                                                          | Up         | 2.3022826   | 0.000557813 |
| BAK1                                                                                           | Up         | 2.0840688   | 0.000638436 |
| BBC3                                                                                           | Up         | 2.1616032   | 0.000223194 |
| BCL2L11                                                                                        | Up         | 5.340361    | 1.4619E-05  |
| BDKRB2                                                                                         | Up         | 2.5592594   | 4.44557E-05 |
| BID                                                                                            | Up         | 2.4654102   | 9.44967E-07 |
| BIRC5                                                                                          | Down       | -4.0315733  | 1.76944E-06 |
| BMP1                                                                                           | Up         | 3.4533818   | 2.53152E-05 |
| BRCA1                                                                                          | Down       | -3.013453   | 2.99571E-05 |
| BRCA2                                                                                          | Down       | -2.852761   | 2.28877E-05 |
| BTG2                                                                                           | Up         | 2.1304529   | 3.59177E-05 |
| BUB1                                                                                           | Down       | -3.664866   | 1.47275E-06 |
| BUB1B                                                                                          | Down       | -3.9987106  | 4.8566E-06  |
| CA9                                                                                            | Down       | -2.1404824  | 2.70905E-06 |
| CCL2                                                                                           | Up         | 6.9680066   | 2.9082E-07  |
| CCNA2                                                                                          | Down       | -3.3991127  | 1.46568E-06 |
| CCNB1                                                                                          | Down       | -3.2859113  | 2.33511E-07 |
| CCNB2                                                                                          | Down       | -2.8234894  | 1.19585E-06 |
| CDC20                                                                                          | Down       | -3.6122062  | 1.22727E-07 |
| CDC25A                                                                                         | Down       | -2.0147529  | 0.002159371 |
| CDC25C                                                                                         | Down       | -2.9542015  | 1.06227E-05 |
| CDC6                                                                                           | Down       | -3.687949   | 9.97116E-07 |
| CDC7                                                                                           | Down       | -2.1907902  | 0.000464492 |

Continued

Table S2 Continued

Continued

| Downstream targets of p53 assessed <i>via</i> bioinformatic analysis after knocking down SNRPG |            |             |             | Downstream targets of p53 assessed <i>via</i> bioinformatic analysis after knocking down SNRPG |            |             |             |
|------------------------------------------------------------------------------------------------|------------|-------------|-------------|------------------------------------------------------------------------------------------------|------------|-------------|-------------|
| Target molecules in dataset                                                                    | Regulation | Fold_change | <i>P</i>    | Target molecules in dataset                                                                    | Regulation | Fold_change | <i>P</i>    |
| CDK1                                                                                           | Down       | -3.3894331  | 3.41338E-08 | DUSP6                                                                                          | Down       | -2.6694174  | 1.71495E-05 |
| CDK2                                                                                           | Down       | -2.3414066  | 0.000723858 | DUT                                                                                            | Down       | -2.1344292  | 0.000372482 |
| CDKN1A                                                                                         | Up         | 2.0020273   | 3.1422E-05  | E2F1                                                                                           | Down       | -2.6413052  | 0.000395762 |
| CDKN3                                                                                          | Down       | -4.096533   | 1.0441E-06  | E2F8                                                                                           | Down       | -2.1755638  | 1.73999E-05 |
| CDT1                                                                                           | Down       | -2.8250837  | 8.81031E-05 | EGF                                                                                            | Up         | 2.2057219   | 0.00019899  |
| CENPF                                                                                          | Down       | -2.5941923  | 7.81122E-05 | EGR1                                                                                           | Up         | 2.6178222   | 7.71939E-06 |
| CEP55                                                                                          | Down       | -4.4314423  | 1.77357E-05 | ENG                                                                                            | Up         | 2.5714345   | 0.000294865 |
| CHEK1                                                                                          | Down       | -2.2617967  | 6.8628E-05  | ENPP2                                                                                          | Up         | 3.4637127   | 2.19034E-06 |
| CKAP2                                                                                          | Down       | -2.1922245  | 1.45445E-05 | EPHX1                                                                                          | Up         | 2.0975645   | 6.01894E-05 |
| CKB                                                                                            | Up         | 2.0246646   | 0.00010062  | ESPL1                                                                                          | Down       | -2.6732528  | 1.67595E-06 |
| CKS1B                                                                                          | Down       | -2.887445   | 4.66962E-05 | EXO1                                                                                           | Down       | -2.5579734  | 0.002804422 |
| CNN2                                                                                           | Down       | -2.6031473  | 1.1283E-05  | EZH2                                                                                           | Down       | -2.6572704  | 3.36057E-05 |
| COL14A1                                                                                        | Up         | 3.668856    | 0.00015045  | EZR                                                                                            | Down       | -2.5168595  | 4.72436E-05 |
| COL1A2                                                                                         | Up         | 3.3868077   | 2.98091E-07 | F11R                                                                                           | Up         | 2.318464    | 2.48687E-05 |
| COL3A1                                                                                         | Up         | 6.0942416   | 2.7127E-05  | FAM83D                                                                                         | Down       | -3.2122777  | 2.72169E-05 |
| COL5A2                                                                                         | Up         | 5.0252233   | 1.22958E-06 | FANCI                                                                                          | Down       | -3.0667968  | 1.31616E-05 |
| CRYAB                                                                                          | Up         | 7.0759397   | 3.75693E-05 | FAS                                                                                            | Up         | 2.1131759   | 2.28379E-05 |
| CTSF                                                                                           | Up         | 2.1767623   | 0.000418674 | FBXW7                                                                                          | Up         | 2.2539053   | 8.28855E-06 |
| CXCL1                                                                                          | Up         | 2.8209019   | 7.21376E-06 | FEN1                                                                                           | Down       | -2.4864187  | 1.55089E-05 |
| DBF4                                                                                           | Down       | -3.6854699  | 2.00798E-05 | FERMT2                                                                                         | Down       | -2.0035534  | 5.38065E-06 |
| DDIAS                                                                                          | Down       | -2.9275298  | 0.002405864 | FN1                                                                                            | Up         | 3.2369347   | 1.12496E-05 |
| DDIT4L                                                                                         | Up         | 5.2929754   | 9.59775E-07 | FOS                                                                                            | Up         | 2.3506725   | 1.93163E-05 |
| DDR1                                                                                           | Up         | 3.3824682   | 1.23232E-06 | FOSL1                                                                                          | Down       | -3.0467093  | 2.21821E-05 |
| DHFR                                                                                           | Down       | -2.5963402  | 2.21914E-05 | FOXO1                                                                                          | Down       | -3.0084047  | 2.38538E-05 |
| DICER1                                                                                         | Up         | 2.3602622   | 2.18034E-05 | FUCA1                                                                                          | Up         | 4.7821565   | 1.45953E-06 |
| DKK1                                                                                           | Down       | -2.4766245  | 0.000258911 | GART                                                                                           | Down       | -2.694237   | 0.000257483 |
| DLGAP5                                                                                         | Down       | -3.9265223  | 1.49922E-05 | GLIPR1                                                                                         | Down       | -2.279712   | 1.72457E-06 |
| DSN1                                                                                           | Down       | -2.786994   | 1.21996E-05 | GMNN                                                                                           | Down       | -2.4207106  | 1.38595E-06 |

Continued

Table S2 Continued

Continued

| Downstream targets of p53 assessed <i>via</i> bioinformatic analysis after knocking down SNRPG |            |             |             |
|------------------------------------------------------------------------------------------------|------------|-------------|-------------|
| Target molecules in dataset                                                                    | Regulation | Fold_change | <i>P</i>    |
| GNAI1                                                                                          | Up         | 2.3712525   | 1.11948E-05 |
| GTSE1                                                                                          | Down       | -3.179631   | 0.000123705 |
| HAS2                                                                                           | Down       | -2.077807   | 0.000111374 |
| HJURP                                                                                          | Down       | -2.9257886  | 4.46607E-06 |
| HMGB2                                                                                          | Down       | -2.4225783  | 1.96645E-06 |
| HMGCS1                                                                                         | Down       | -2.1236782  | 1.71473E-06 |
| HMMR                                                                                           | Down       | -4.2627034  | 3.08806E-06 |
| ICAM1                                                                                          | Up         | 2.7644155   | 1.96913E-05 |
| ID3                                                                                            | Up         | 4.5758276   | 2.72157E-06 |
| IGDCC4                                                                                         | Up         | 3.4510975   | 2.31546E-06 |
| IGFBP3                                                                                         | Up         | 4.6044054   | 4.75433E-07 |
| IGFBP4                                                                                         | Up         | 2.587116    | 0.000130696 |
| IGFBP5                                                                                         | Up         | 14.235849   | 9.1868E-06  |
| IL1B                                                                                           | Down       | -3.6559737  | 2.24477E-06 |
| IL6                                                                                            | Up         | 2.2604623   | 5.30168E-07 |
| ITGA2                                                                                          | Down       | -2.00359    | 3.0551E-06  |
| KIAA0101                                                                                       | Down       | -3.5872898  | 7.89813E-05 |
| KIF23                                                                                          | Down       | -3.642677   | 0.000104343 |
| KIFC1                                                                                          | Down       | -3.3392606  | 2.3573E-05  |
| KIT                                                                                            | Up         | 2.1119153   | 0.000167271 |
| KNTC1                                                                                          | Down       | -2.299394   | 2.53516E-06 |
| KRT15                                                                                          | Down       | -3.0376554  | 2.42634E-05 |
| LAMA5                                                                                          | Up         | 2.2744126   | 2.76063E-05 |
| LBR                                                                                            | Down       | -2.9253728  | 1.75678E-06 |
| LPIN1                                                                                          | Down       | -3.7294765  | 6.3445E-07  |
| MAD2L1                                                                                         | Down       | -3.0069954  | 3.91006E-05 |
| MAFB                                                                                           | Up         | 3.5815496   | 1.60634E-07 |
| MAN2A1                                                                                         | Up         | 2.584694    | 5.13991E-06 |

| Downstream targets of p53 assessed <i>via</i> bioinformatic analysis after knocking down SNRPG |            |             |             |
|------------------------------------------------------------------------------------------------|------------|-------------|-------------|
| Target molecules in dataset                                                                    | Regulation | Fold_change | <i>P</i>    |
| MAP3K8                                                                                         | Up         | 3.197822    | 7.80446E-05 |
| MCM2                                                                                           | Down       | -3.3188963  | 4.27989E-07 |
| MCM3                                                                                           | Down       | -2.6946843  | 1.45363E-06 |
| MCM4                                                                                           | Down       | -2.8259888  | 2.29587E-05 |
| MCM5                                                                                           | Down       | -2.7076702  | 0.000152585 |
| MCM6                                                                                           | Down       | -2.7770162  | 1.12485E-06 |
| MCM7                                                                                           | Down       | -3.4240937  | 1.39583E-06 |
| MELK                                                                                           | Down       | -3.3216226  | 6.23091E-07 |
| MGST2                                                                                          | Up         | 3.2562354   | 1.54722E-06 |
| MIR17HG                                                                                        | Down       | -2.792616   | 0.000221759 |
| MIS18BP1                                                                                       | Down       | -2.1686413  | 3.06466E-05 |
| MKI67                                                                                          | Down       | -3.6224332  | 2.8842E-06  |
| MMP1                                                                                           | Down       | -2.77545    | 9.05794E-06 |
| MTDH                                                                                           | Down       | -2.0708454  | 0.000109479 |
| MYC                                                                                            | Down       | -2.3531933  | 6.84799E-06 |
| MYO10                                                                                          | Down       | -2.056971   | 0.000290178 |
| NCAPG                                                                                          | Down       | -3.466131   | 8.75417E-06 |
| NCAPH                                                                                          | Down       | -3.277411   | 3.37501E-07 |
| NDC80                                                                                          | Down       | -3.2344527  | 4.81342E-06 |
| NDRG1                                                                                          | Down       | -2.0377207  | 5.49884E-05 |
| NDRG4                                                                                          | Up         | 2.0044627   | 5.06301E-05 |
| NEK2                                                                                           | Down       | -4.0638337  | 4.49023E-05 |
| NMU                                                                                            | Down       | -2.0142093  | 0.000157581 |
| NR2F1                                                                                          | Up         | 2.3057506   | 2.93534E-05 |
| NRP1                                                                                           | Up         | 2.192101    | 3.39564E-05 |
| NUSAP1                                                                                         | Down       | -4.121419   | 1.35285E-06 |
| PBK                                                                                            | Down       | -3.1371903  | 3.61418E-07 |
| PCDH7                                                                                          | Up         | 3.6979644   | 3.16436E-05 |

Continued

Table S2 Continued

Continued

| Downstream targets of p53 assessed <i>via</i> bioinformatic analysis after knocking down SNRPG |            |             |             | Downstream targets of p53 assessed <i>via</i> bioinformatic analysis after knocking down SNRPG |            |             |             |
|------------------------------------------------------------------------------------------------|------------|-------------|-------------|------------------------------------------------------------------------------------------------|------------|-------------|-------------|
| Target molecules in dataset                                                                    | Regulation | Fold_change | <i>P</i>    | Target molecules in dataset                                                                    | Regulation | Fold_change | <i>P</i>    |
| PDGFRA                                                                                         | Up         | 3.8465552   | 0.000319564 | S100A2                                                                                         | Down       | -2.0636077  | 2.59487E-06 |
| PDIA5                                                                                          | Up         | 2.6322782   | 1.0041E-05  | SAT1                                                                                           | Up         | 2.3773856   | 1.38163E-06 |
| PGM3                                                                                           | Down       | -2.1608644  | 4.79481E-05 | SERPINB2                                                                                       | Down       | -5.9836097  | 4.76691E-06 |
| PHGDH                                                                                          | Down       | -2.5204659  | 2.53071E-06 | SERPINE1                                                                                       | Down       | -2.776294   | 1.63496E-06 |
| PIK3R1                                                                                         | Up         | 3.5230632   | 2.80978E-06 | SERPINH1                                                                                       | Up         | 2.0949132   | 3.29312E-06 |
| PIK3R3                                                                                         | Up         | 4.3986635   | 7.12702E-07 | SESN1                                                                                          | Up         | 4.083665    | 1.25736E-07 |
| PLK1                                                                                           | Down       | -2.3198814  | 0.000164844 | SFRP2                                                                                          | Up         | 6.6169605   | 4.69607E-05 |
| PODXL                                                                                          | Down       | -2.613001   | 3.50673E-05 | SGK1                                                                                           | Up         | 2.060982    | 1.9894E-05  |
| POLA1                                                                                          | Down       | -2.0860755  | 2.76132E-06 | SHISA5                                                                                         | Up         | 2.085424    | 3.4949E-06  |
| POLE2                                                                                          | Down       | -3.2632394  | 1.19058E-05 | SIDT2                                                                                          | Up         | 2.217279    | 0.000121514 |
| POSTN                                                                                          | Up         | 6.2268686   | 2.24186E-05 | SLC2A12                                                                                        | Up         | 2.389174    | 7.79558E-06 |
| PPM1D                                                                                          | Up         | 2.0515914   | 0.002066009 | SMAD6                                                                                          | Up         | 2.2160177   | 1.37075E-06 |
| PRC1                                                                                           | Down       | -3.2625606  | 2.8762E-06  | SMAD7                                                                                          | Up         | 2.0452683   | 9.80671E-05 |
| PRDM1                                                                                          | Up         | 2.4411225   | 3.35728E-05 | SMC4                                                                                           | Down       | -2.0496526  | 1.14819E-05 |
| PRIM1                                                                                          | Down       | -3.0388367  | 2.39556E-05 | SMURF2                                                                                         | Down       | -2.0765357  | 1.56039E-05 |
| PTCHD4                                                                                         | Up         | 2.135742    | 0.000167485 | SOD2                                                                                           | Up         | 2.3653908   | 5.75501E-08 |
| PTPN12                                                                                         | Down       | -2.4150302  | 8.74551E-06 | SPATA18                                                                                        | Up         | 2.062645    | 0.000359106 |
| PTTG1                                                                                          | Down       | -2.9523795  | 1.28204E-06 | SPC25                                                                                          | Down       | -4.1329875  | 8.29516E-07 |
| RACGAP1                                                                                        | Down       | -2.4381306  | 4.61863E-05 | SPHK1                                                                                          | Down       | -3.0104914  | 1.14056E-05 |
| RAD51                                                                                          | Down       | -2.2705245  | 9.49069E-05 | STMN1                                                                                          | Down       | -2.428075   | 3.16331E-05 |
| RAD51AP1                                                                                       | Down       | -3.490721   | 6.10245E-05 | TDO2                                                                                           | Up         | 4.0305943   | 1.39229E-07 |
| RARRES3                                                                                        | Up         | 4.570907    | 6.67711E-07 | TFPI2                                                                                          | Down       | -5.1304183  | 2.30218E-07 |
| RBL1                                                                                           | Down       | -2.6507204  | 0.000324717 | TGFB3                                                                                          | Up         | 7.6097136   | 5.65463E-05 |
| RBPJ                                                                                           | Down       | -3.2799733  | 4.3E-05     | TIGAR                                                                                          | Up         | 2.8314755   | 6.22895E-07 |
| RFC3                                                                                           | Down       | -3.0650783  | 6.62013E-06 | TMEM97                                                                                         | Down       | -2.6563091  | 0.00019609  |
| RFC4                                                                                           | Down       | -2.6281676  | 3.20178E-06 | TNFAIP2                                                                                        | Up         | 3.5823321   | 1.6619E-06  |
| RRM1                                                                                           | Down       | -2.0249104  | 3.14287E-05 | TNFRSF10C                                                                                      | Up         | 3.342336    | 0.000138792 |
| RRM2                                                                                           | Down       | -2.6255248  | 7.52328E-07 | TNFRSF10D                                                                                      | Up         | 2.337418    | 6.22351E-06 |

Continued

**Table S2** Continued

Downstream targets of p53 assessed *via* bioinformatic analysis after knocking down SNRPG

| Target molecules in dataset | Regulation | Fold_change | <i>P</i>    |
|-----------------------------|------------|-------------|-------------|
| TNFRSF9                     | Up         | 2.0453916   | 1.28021E-06 |
| TNFSF10                     | Up         | 2.4190438   | 3.8299E-05  |
| TOP2A                       | Down       | -3.2117655  | 4.4514E-06  |
| TP53I3                      | Up         | 3.2173285   | 3.44497E-05 |
| TPD52L1                     | Up         | 5.191617    | 2.63324E-05 |
| TPX2                        | Down       | -3.0621989  | 3.22177E-07 |
| TRIM22                      | Up         | 2.3660667   | 1.25788E-06 |
| TSPAN6                      | Up         | 2.2814004   | 6.81893E-06 |
| TTC28                       | Up         | 2.1429846   | 1.7392E-05  |
| TTK                         | Down       | -3.4548926  | 2.0953E-05  |
| TUBB                        | Down       | -2.0580049  | 1.89709E-06 |
| TYMS                        | Down       | -2.8719566  | 2.08657E-06 |
| UBE2C                       | Down       | -3.1527188  | 1.35925E-06 |
| UBE2T                       | Down       | -2.235396   | 8.42079E-07 |
| UHRF1                       | Down       | -2.9184792  | 2.20236E-05 |
| USP14                       | Down       | -3.0199425  | 3.90779E-05 |
| VAMP4                       | Down       | -2.2361658  | 5.1771E-07  |
| VEGFA                       | Down       | -2.4606857  | 5.41824E-07 |
| VRK1                        | Down       | -3.4682982  | 7.9567E-06  |
| WDHD1                       | Down       | -3.1272936  | 4.82984E-05 |
| XAF1                        | Up         | 2.917754    | 0.000314485 |
| ZMAT3                       | Up         | 2.7310157   | 1.09655E-06 |
| ZNF175                      | Down       | -2.184365   | 0.000152832 |



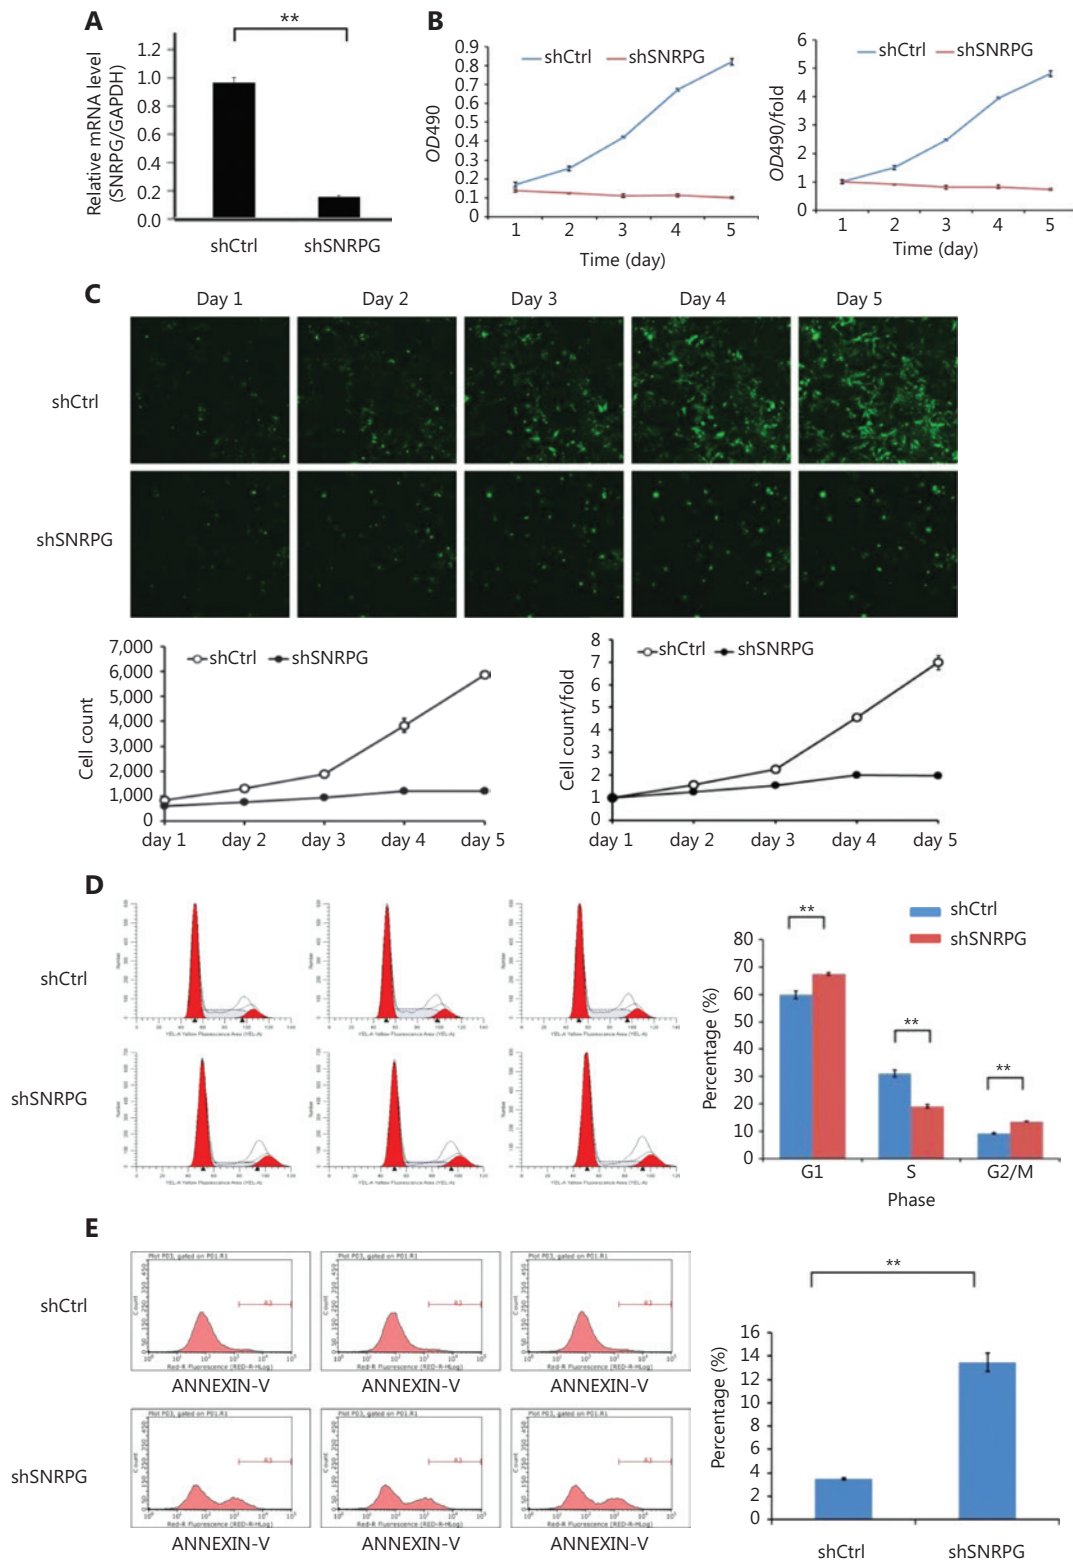

**Figure S1** Effects of knocking down *SNRPG* on cell proliferation in U251 cells. (A) *SNRPG* knockdown was performed using shRNAs in U251 cells. The downregulated expression of *SNRPG* by shSNRPG in U251 was further confirmed via RT-qPCR. (B) MTT assay showed that *SNRPG* knockdown significantly increased cell proliferation in U251 cells compared with the control cells. The OD values were measured at indicated days (mean  $\pm$  SD,  $n = 3$ ). (C) Celigo assay was performed to detect the cell viability over 5 days after transfection. The colony numbers of U251 cells transfected with shCtrl were evidently higher than those transfected with shSNRPG (mean  $\pm$  SD,  $n = 3$ ). (D–E) Effects of knocking down *SNRPG* on cell apoptosis and cell cycle progression in U251 cells. (D) Flow cytometric analysis was performed to further examine the effect of *SNRPG* on proliferation of GBM cells by altering cell cycle progression. Error bars, standard error.  $**P < 0.01$ . (E) To further determine the physiological role of *SNRPG* in cells growth, U251 cells were transfected with shSNRPG. After 48 h, cell apoptosis were analyzed by flow cytometric analysis. Graphs show the mean percentages of three biological replicates. Error bars, standard error.  $**P < 0.01$ .

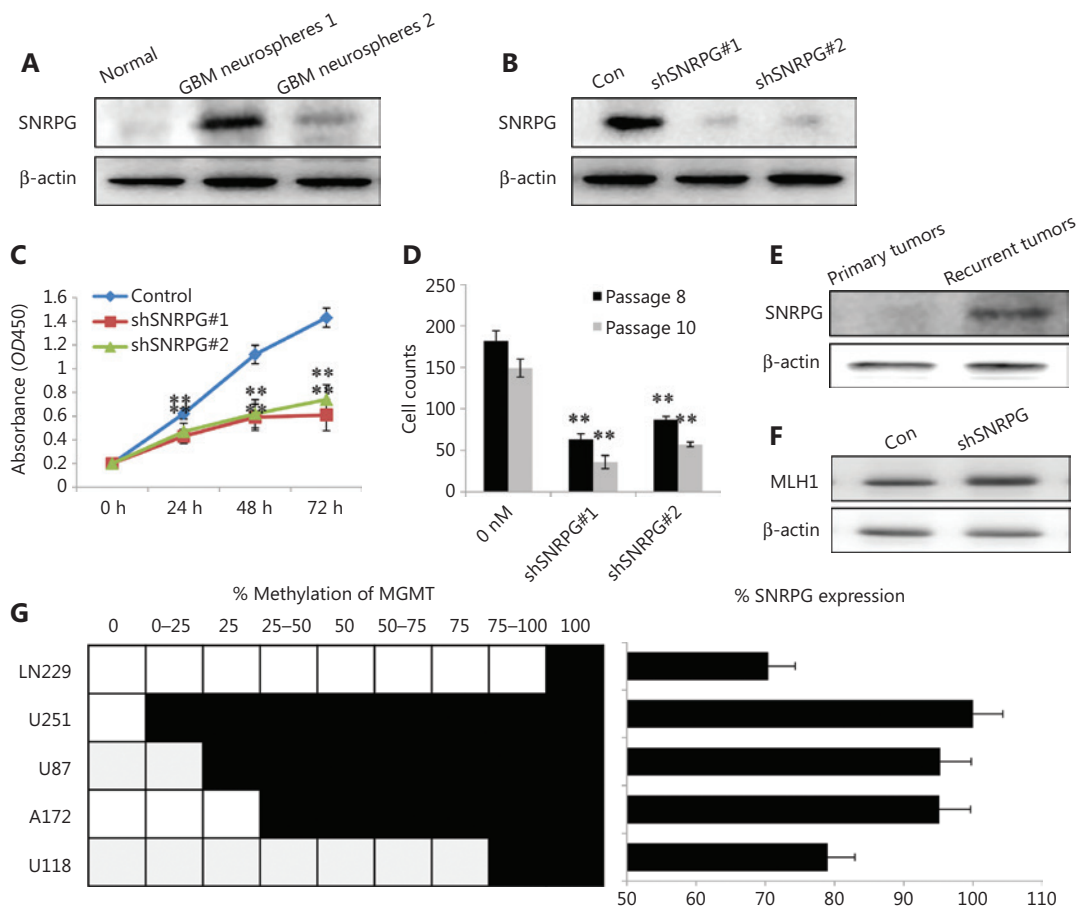

**Figure S2** Expression of *SNRPG* in human GBM neurospheres and effect of silencing *SNRPG* on the proliferation and invasion of glioma cells. (A) The expression level of *SNRPG* in human normal brain tissue and GBM neurospheres were quantified by Western blot. (B) *SNRPG* protein levels in GBM neurospheres, as indicated, were determined by a Western blot analysis.  $\beta$ -actin was used as the internal control (C) CCK8 test to examine the influence of silencing *SNRPG* on the proliferation ability of GBM neurospheres. (D) Transwell invasion assay to test the influence of *SNRPG* inhibition on the invasion ability of GBM neurospheres. ( $**P < 0.01$ ). (E) The protein expression levels of *SNRPG* in samples of primary and recurrent GBM patients.  $n = 3$ . (F) Expression of mismatch repair (MMR) protein MLH1. MLH1 expression was significantly increased in shSNRPG compared to control group. (G) The possible correlation between *SNRPG* protein expression and MGMT promoter methylation percentage in GBM cell lines.

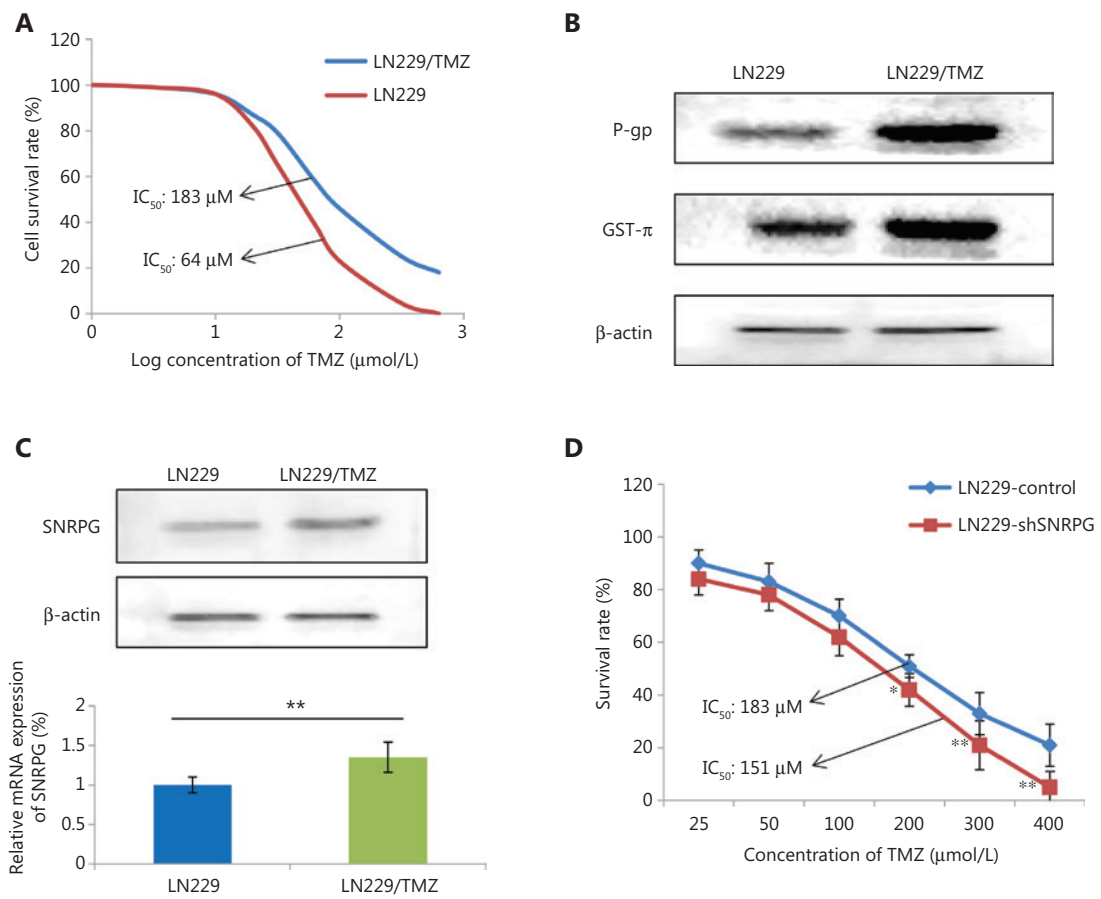

**Figure S3** *SNRPG* suppression sensitizes human GBM cells to TMZ. (A) The MTT assay was used to determine the viability of LN229/TMZ ( $IC_{50}$ , 64  $\mu$ M vs. 183  $\mu$ M). (B) Western blot analysis of the drug resistance-related genes P-gp and GST- $\pi$  in LN229/TMZ cells. (C) Western blot analysis (upper panel) and RT-qPCR analysis (lower panel) of *SNRPG* in LN229/TMZ cells. (D) The MTT assay was used to determine the cell viability after *SNRPG* knockdown. Downregulation of *SNRPG* significantly reduced the  $IC_{50}$  compared with that of the control group (151  $\mu$ M vs. 183  $\mu$ M; \* $P$  < 0.05, \*\* $P$  < 0.01).
